# Supplementary material
Source: Springer Nature journal article supplement (https://www.springermedizin.de/resource/supplementary/12958_2003_119_MOESM4_ESM.pdf/9566160)

Macrophages CM

[ ] Apoptotic Cells

Low High Med CPT NT

XIAP

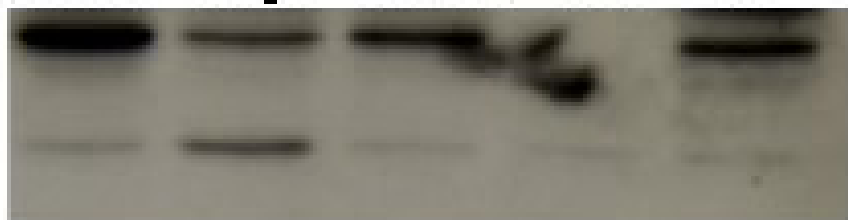

Caspase-3

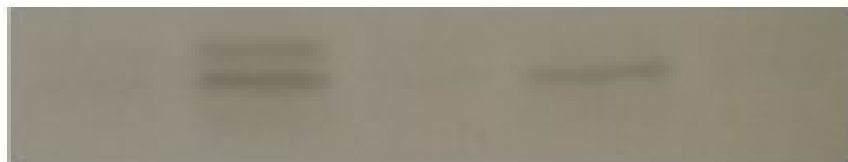

Beta Actin

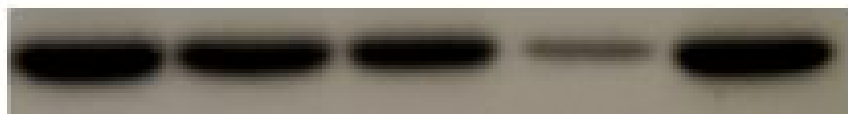

Supplement: MOESM4 [file 9566160]
